# Supplementary material
Source: PubMed Central journal article supplement (PMC6475786)
Supplement: JVI.02048-18-s0001.pdf [file JVI.02048-18-s0001.pdf]

**Supplementary table:** DNA and protein sequences of the clinical strain NPC used for fluorescence microscopy experiments.

|                                                                                                                                                                                                                                                                                                                                                                                                                                                                                                                                                                                                                                                                                                                                                                                                                                                                                                                                                                                                                                                                                                                                                                                                                                                                                                                                                                                                                                                                                                                                                                                                                                                                                                                                                                                                                                            |
|--------------------------------------------------------------------------------------------------------------------------------------------------------------------------------------------------------------------------------------------------------------------------------------------------------------------------------------------------------------------------------------------------------------------------------------------------------------------------------------------------------------------------------------------------------------------------------------------------------------------------------------------------------------------------------------------------------------------------------------------------------------------------------------------------------------------------------------------------------------------------------------------------------------------------------------------------------------------------------------------------------------------------------------------------------------------------------------------------------------------------------------------------------------------------------------------------------------------------------------------------------------------------------------------------------------------------------------------------------------------------------------------------------------------------------------------------------------------------------------------------------------------------------------------------------------------------------------------------------------------------------------------------------------------------------------------------------------------------------------------------------------------------------------------------------------------------------------------|
| DNA sequence of NPC isolated from clinical strain used in part of this work:                                                                                                                                                                                                                                                                                                                                                                                                                                                                                                                                                                                                                                                                                                                                                                                                                                                                                                                                                                                                                                                                                                                                                                                                                                                                                                                                                                                                                                                                                                                                                                                                                                                                                                                                                               |
| ATGTCTGACAGACGTCAAAACAGAAAGACGCCAGATGAGCAACGCAAAG<br>CCAATGCTCTCATAATAAATGAGAACATTGAGGCTTACATTGCCATTTGTA<br>AGGAAGTGGGCCTTAATGGCGATGAAATGTTGATCCTGGAAAATGGCATA<br>GCAATTGAAAAAGCTATAAGAATATGTTGTGACGGAAAGTATCAAGAAA<br>AAAGGGAAAAGAAAGCAAGAGACGCCAAAGAGCGGACAGTAACTTCAA<br>CGCAGATTCCATTGGGATCAGACTAGTTAAAAGAGCTGGTTCAGGCACCA<br>ATATAACCTACCATGCAGTTGTTGAATTAACAAGCCGCTCAAGAATTGTTT<br>AAATTCTCAAATCTCATTGGGGAAATGAACTAACAGAGCAAAAATTGCA<br>GGAAAAGACTCGGCTTCTCTGCACTCTTCGCTTCTAACTTGGAAGCAATT<br>ATCTATCAAAGAGGAAGAAACGCAGCAAGAAGAAATGGTTCTGCTGAAT<br>TGTTCACTCTCACTCAGGGGGCTGGAATCGAACTAGATATAAATGGATA<br>ATGGAAAGGCATATCGGAATTGGGGTTCTTATAGCTGACGCAAAGGTTT<br>AATAAATGGAAAGAGAGAAGGCCAAAAGAGGAGTTGATGCCAATGTaAAA<br>TTGAGAGCAGGAACAACCTGGTTCCTCTGGAAAGAGCCATACAAGGAAT<br>TGAGAAAAAAGCGTTTCCTGGACCTTTAAGAGCACTAGCAAGAAGAGTTG<br>TAAAAGCAAACACTACAATGATGCCAGAGAAGCTCTAAATGTCATCGCAGAG<br>GCATCACTCCTGTAAAACCTCAGATAACCAACAAGATGACAATGCCTTG<br>GTGTATGTGGTTGGCTGCCAGACTTACTCTGAAAGATGAGTTTGCCAATTT<br>CTGTGCATATGCGGGAAGAAGAGCCTTTGAGGTCTTCAATATTGCAATGG<br>AGAAAATTGGAATTTGTTCCCTTCAAGGGACAATAATGAACGATGATGAA<br>ATTGAGTCAATAGAGGACAAGGCTCAAGTATTAATGATGGCATGCTTTGG<br>ACTTGCTTATGAAGACTTCAGTTTGGTCTCTGCTATGGTTAGCCACCCTCT<br>TAAGTTGAGAAACAGAATGAAAATAGGAAACTTCAGAGTCGGTGAAAAA<br>GTCTCAACAGTGCTTTCTCCCTTATTGAGATTCACAAGATGGGCAGAATTT<br>GCTCAAAGATTTGCTCTTCAGGCAAATACTTCAAGAGAAGGTGCTCAAAT<br>CAGCAACTCAGCAGTTTTTGCAGTGGAAAGGAAAATAACCACAGATGTTT<br>AAAGGGTTGAAGAGCTACTAAATAAAGTTCAAGCTCATGAAGATGAACC<br>ATTACAAACACTCTACAAAAAAGTAAGAGAACAAATTTCTATAATTGGAA<br>GGAACAAGTCTGAGATAAAAGAGTTTCTAGGGTCTTCAATGTATGATTTA<br>AATGATCAAGAAAAACAAAATCCAATAAATTTCAAGGTCTGGAGCACATCC<br>TTTCTTCTTCGAATTCGACCCAGACTACAACCCATAAGAGTGAAAAGGC<br>CCAAAAGCCAATAGCAAAGAGAAATTCAAATATCAGCAGATTGGAAGA<br>AGAAGGAATGGATGAAAATTCAGAGGTTGGACAAGCCAAGAAGATGAAA |

CCCTTGGATCAATTGGCCAGCACCGTAGCAACATTCCTGGAAAAAATTA  
A

Protein sequence of NPC used in part of this work, deduced from DNA sequence:

MSDRRQNRKTPDEQRKANALIINENIEAYIAICKEVGLNGDEMLILENGIAIEK  
AIRICCDGKYQEKREKKARDAQRADSNFNADSIGIRLVKRAGSGTNITYHAV  
VELTSRSRIVQILKSHWGNELNRAKIAGKRLGFSALFASNLEAIYQRGRNAA  
RRNGSAELFTLTQGAGIETRYKWIMERHIGIGVLIADAKGLINGKREGKRGVD  
ANVKLRAGTTGSPLERAIQGIEKKAFPGPLRALARRVVKANYNDAREALNVI  
AEASLLLKPQITNKMTMPWCMWLAARLTLKDEFANFCAYAGRRAFEVFNIA  
MEKIGICSFQGTIMNDDEIESIEDKAQVLMMACFGLAYEDFSLVSAMVSHPLK  
LRNRMKIGNFRVGEKVSTVLSPLLRFRTRWAEFAQRFALQANTSREGAQISNS  
AVFAVERKITTDVQRVEELLNKVQAHEDPLQTLYKKVREQISIIGRNKSEIKE  
FLGSSMYDLNDQEKQNPINFRSGAHPFFFEFDPDYNPIRVKRPKKPIAKRNSNI  
SRLEEEGMDENSEVQGAKKMKPLDQLASTSSNIPGKN
